# Supplementary material for: Electromechanical coupling of isotropic fibrous networks with tailored auxetic behavior induced by water-printing under tension
Source: Royal Society of Chemistry journal article supplement (doi:10.1039/d0tc05526c), 2021-01-01
Supplement: d0tc05526c1.pdf [file d0tc05526c1.pdf]

## Electronic supplementary information

### Electromechanical Coupling of Isotropic Fibrous Networks with Tailored Auxetic Behavior Induced by Water-Printing under Tension

Jinyuan Zhang<sup>a</sup>, Sheila M. Goodman<sup>b</sup>, Heather G. Wise<sup>b</sup>, Anthony B. Dichiara<sup>b</sup>, and Jae-Hyun Chung<sup>\*a</sup>

<sup>a</sup>. Department of Mechanical Engineering, University of Washington, Box 352600, Seattle, WA, 98195, USA. Email: jae71@uw.edu

<sup>b</sup>. School of Environmental and Forest Sciences, University of Washington, Box 352600, Seattle, WA, 98195, USA

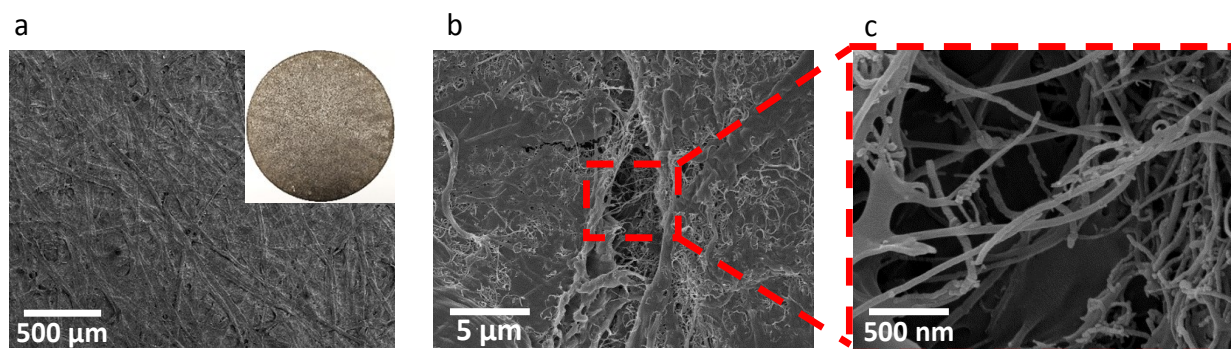

**Fig. S1** (a-c) Representative SEM images of 10 CNT wt %-CPC at increasing magnification to examine the overall morphology and distribution of CNT-OH throughout the cellulose matrix. An image of the pristine CPC is shown as an inset in a.

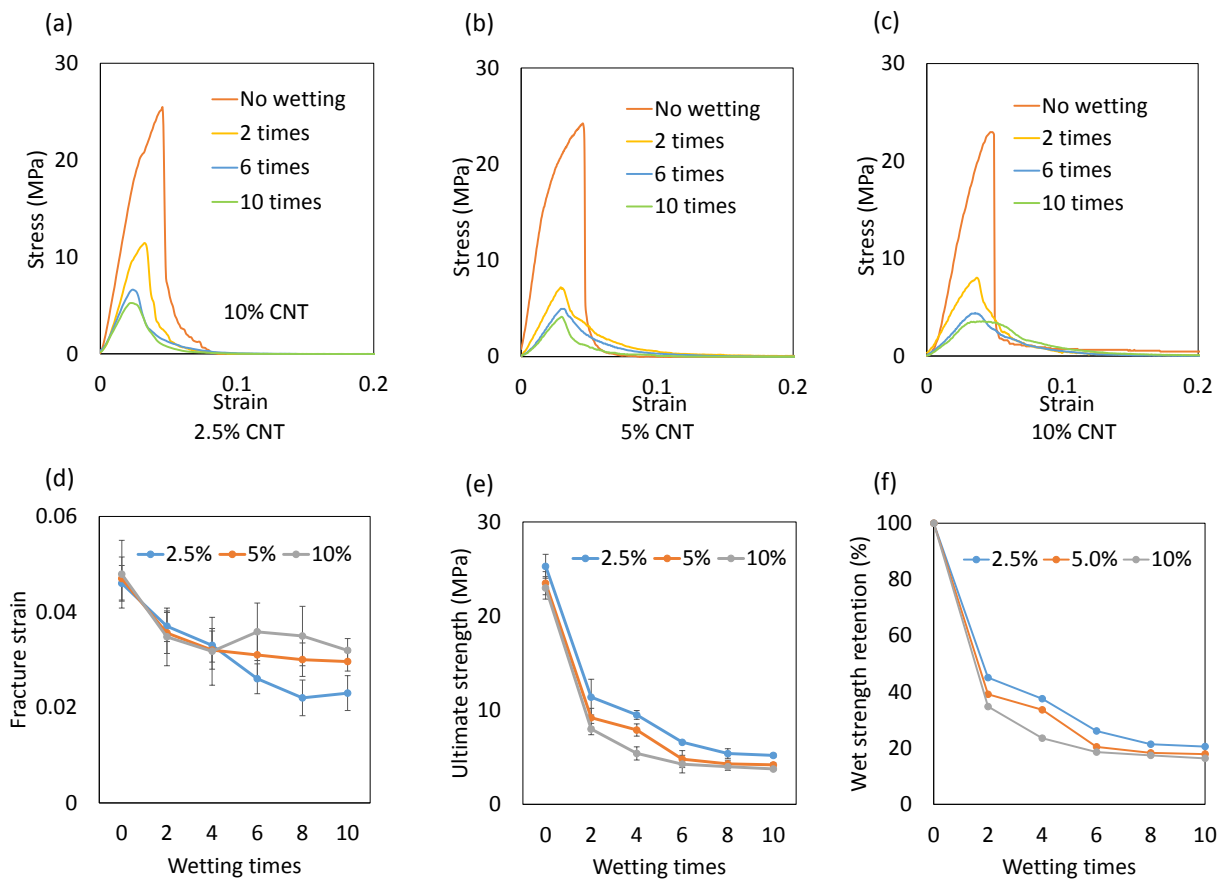

**Fig. S2** Mechanical properties of CNT-cellulose composites by wet-straining method. (a-c) Stress-strain curves of CNT-cellulose composites with 2.5, 5 and 10-CNT wt % of after being applied wetting for 0, 2, 6 and 10 times. (d-e) Fracture strain and ultimate strength summary for CNT-cellulose composites with 2.5, 5 and 10-CNT wt % after being applied wetting for 0, 2, 4, 6, 8 and 10 times. (f) Wet strength retention of CNT-cellulose composites with 2.5, 5 and 10-CNT wt % after being applied wetting for 0, 2, 4, 6, 8 and 10 times.

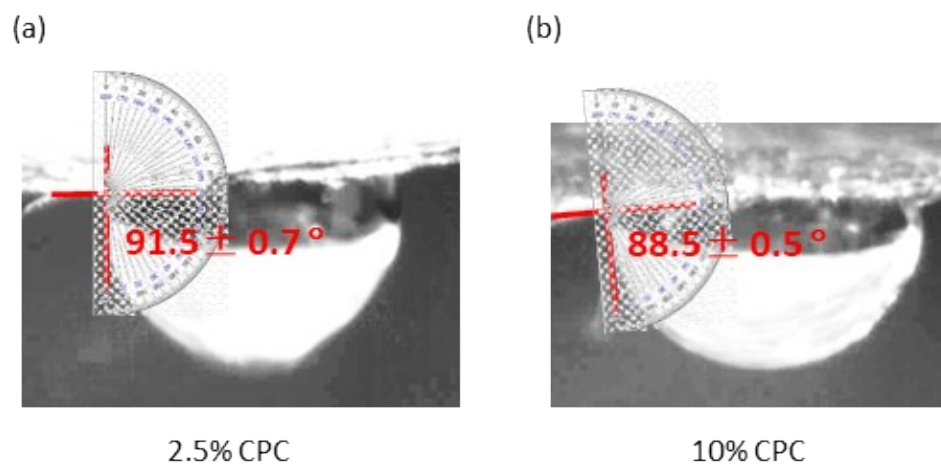

**Fig. S3** Contact angles of (a) CPC with 2.5 wt %, and (b) CPC with 10 wt %.

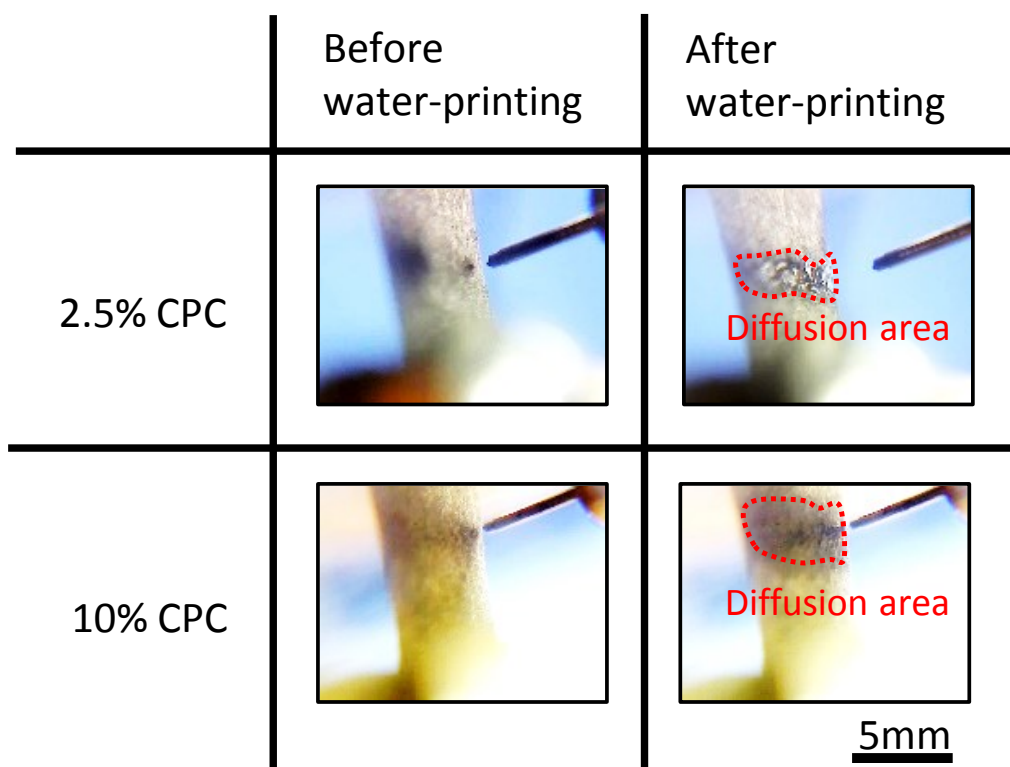

**Fig. S4** Pictures of water-printing regions on CPC with 2.5 and 10 CNT wt %.

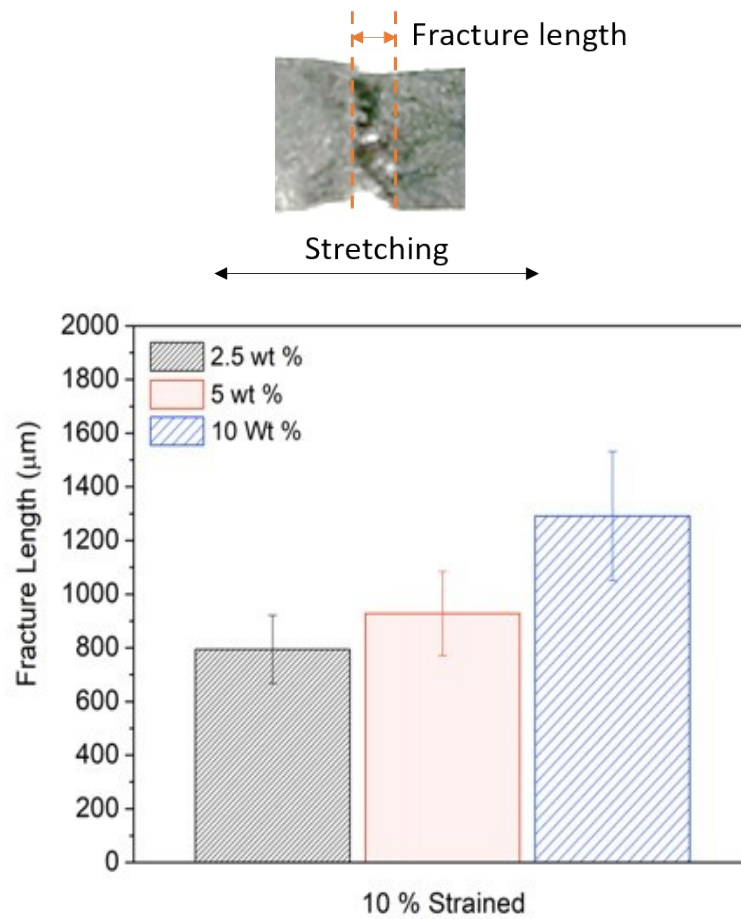

**Fig. S5** Fracture lengths of CPC with 2.5, 5, and 10 CNT wt %.

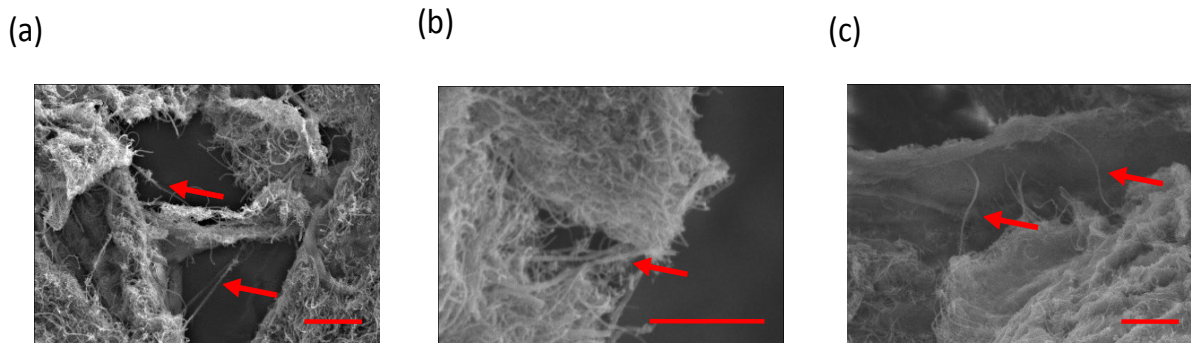

**Fig. S6** SEM images of CNT spanning cellulose fibers. The scale bar is 2 μm.

| CNT wt%<br>Strain | 0%                                                                                | 2.5%                                                                              | 5%                                                                                 | 10%                                                                                         |
|-------------------|-----------------------------------------------------------------------------------|-----------------------------------------------------------------------------------|------------------------------------------------------------------------------------|---------------------------------------------------------------------------------------------|
| 0                 | 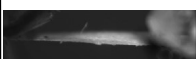 | 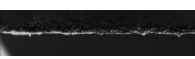 | 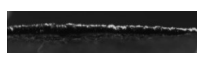 | 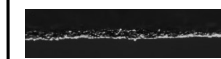         |
| 0.02              | 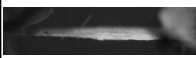 | 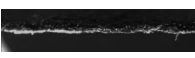 | 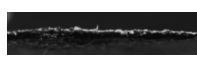 | 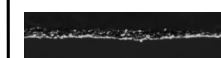         |
| 0.04              | 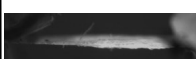 | 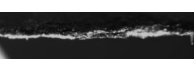 | 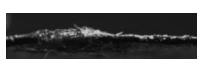 | 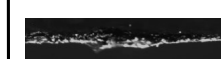         |
| 0.10              | 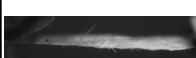 | 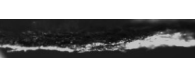 | 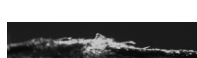 | 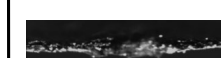         |
|                   |                                                                                   |                                                                                   |                                                                                    | 1 mm<br>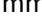 |

**Fig. S7** Optical microscope images of profiles of pure paper and CPC with 2.5, 5, and 10 CNT wt %, showing the thickness at the strain of 0, 0.02, 0.04, and 0.10.

### Simulation of the stress distribution of water-printed specimens under tension

The stress distribution of water-printed specimens under tension was studied by COMSOL. The solid mechanics models were built (Fig. S8a-c). The dimension of the specimen is 10 mm× 5 mm, with a 0.3 mm× 5 mm water-printed region in the middle, and two 0.1 mm× 5 mm transition regions between the water-printed and non-water-printed region. The dimensions of the transition regions were determined by the measurement of the shades on water-printed specimens. Regarding the actual printing-stretching, three scenarios were discussed with the auxetic behavior of paper, and the effect of water-printing alone, and the auxetic behavior of paper alone.

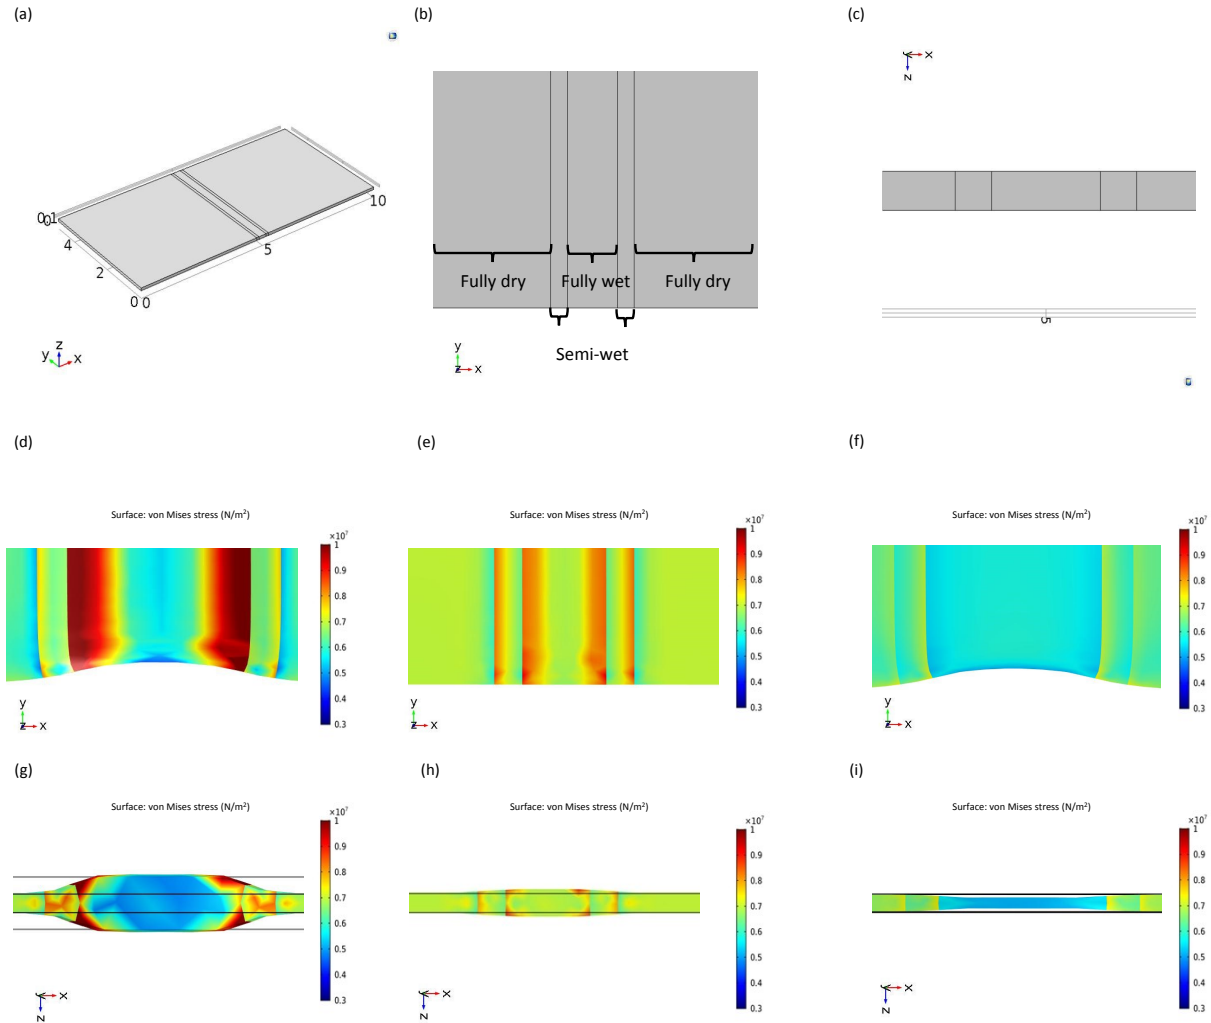

**Fig. S8** COMSOL 3D models and simulation results (a) 3D view. (b) x-y planar view zoomed in dry, fully-wet, and semi-wet regions. (c) x-z planar view zoomed in a fully-wet region. (d) Stress distribution of x-y plane in scenario 1. (e) Stress distribution of x-y plane in scenario 2. (f) Stress distribution of x-y plane in scenario 3. (g) Stress distribution of x-z plane in scenario 1. (h) Stress distribution of x-z plane in scenario 2. (i) Stress distribution of x-z plane in scenario 3. (Scale factor for displacement: 50).

The parameters were as follows. The Young's modulus data were obtained from tensile tests (Fig. 2a). The Poisson's ratio was obtained from the characterization of the auxetic behavior (Fig. 2b).

Scenario 1 - printing-stretching:

Young's moduli for dry, semi-wet, and fully wet regions were 700, 420, and 130 Mpa  
The Poisson's ratios were (0.2, 0.2, -0.2), (0.2, 0.2, -0.6), and (0.2, 0.2, -0.9).

Scenario 2 - no water-printing, but with auxetic behavior:

Young's moduli for dry, semi-wet, and fully wet regions were the same as 700 Mpa.  
The Poisson's ratios were (0.2, 0.2, -0.2), (0.2, 0.2, -0.6), and (0.2, 0.2, -0.9)

Scenario 3 - no auxetic behavior, but with water-printing:

Young's moduli for dry, semi-wet, and fully wet regions were 700, 420, and 130 Mpa.  
The Poisson's ratios were the same as (0.2, 0.2, 0.2).

The Young's moduli and Poisson's ratios of dry and fully-wet regions were obtained from the experiment. The data for semi-wet regions were the average values of dry and fully-wet regions. Each scenario was applied to build the 3D models.

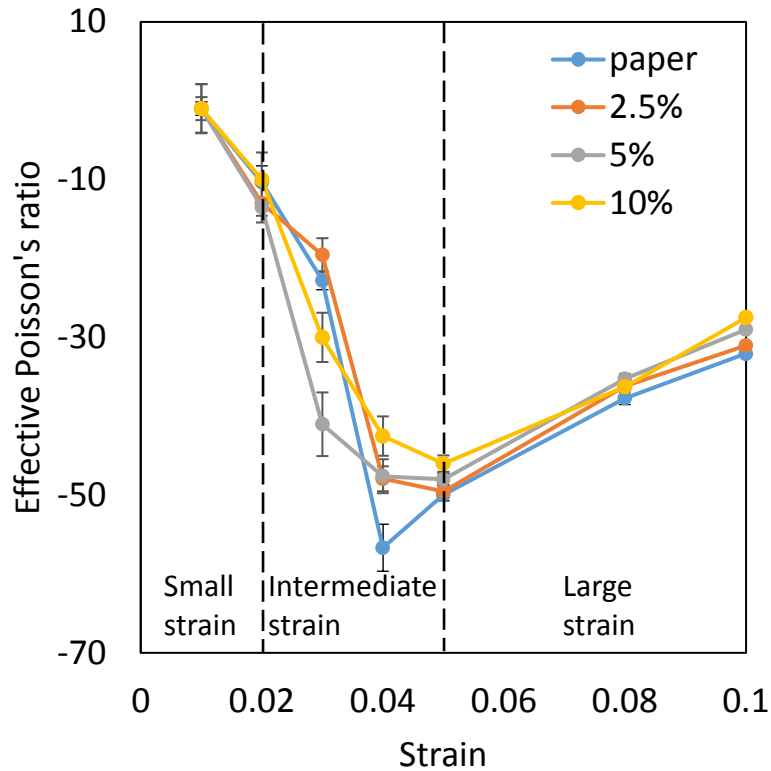

**Fig. S9** Effective Poisson's ratio of pure paper and CPC with 2.5, 5, and 10 CNT wt% at strains of 0, 0.01, 0.02, 0.03, 0.04, 0.05, 0.08, and 0.10.

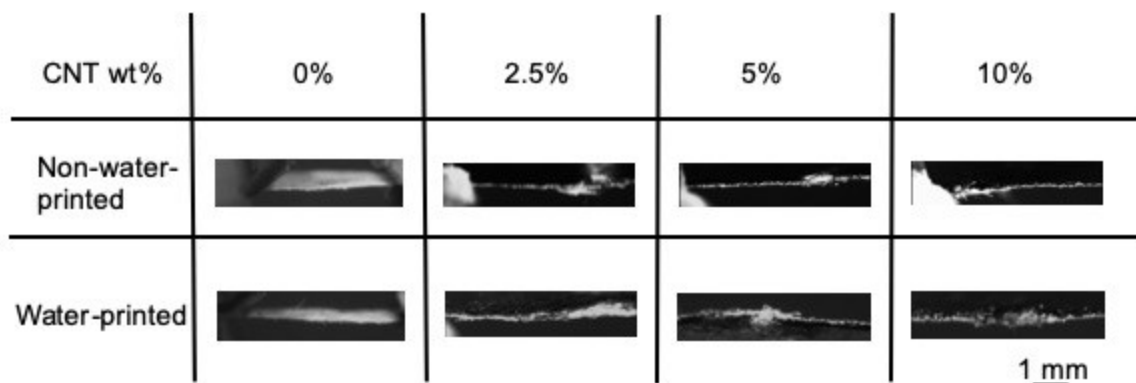

**Fig. S10** Optical microscope images show the profiles of water-printed and non-water-printed pure paper and CPC with 2.5, 5, and 10 CNT wt %, at their maximum thickness.

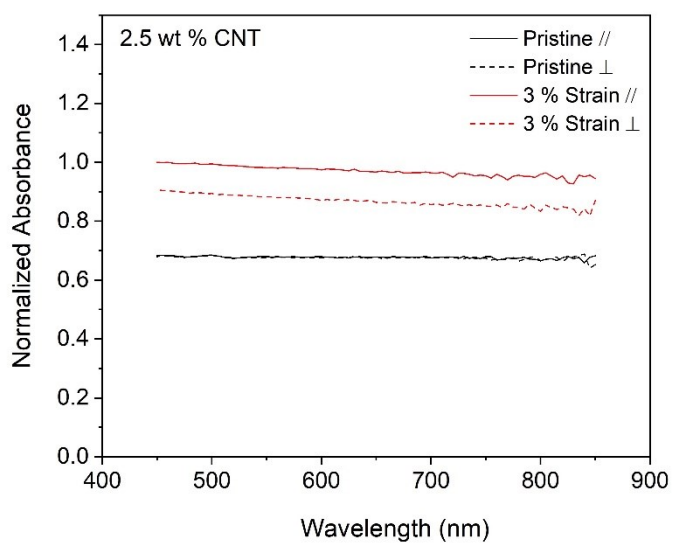

**Fig. S11** Polarized absorption spectra of conductive papers containing 2.5 CNT wt % under strains at 0.0 and 0.03.

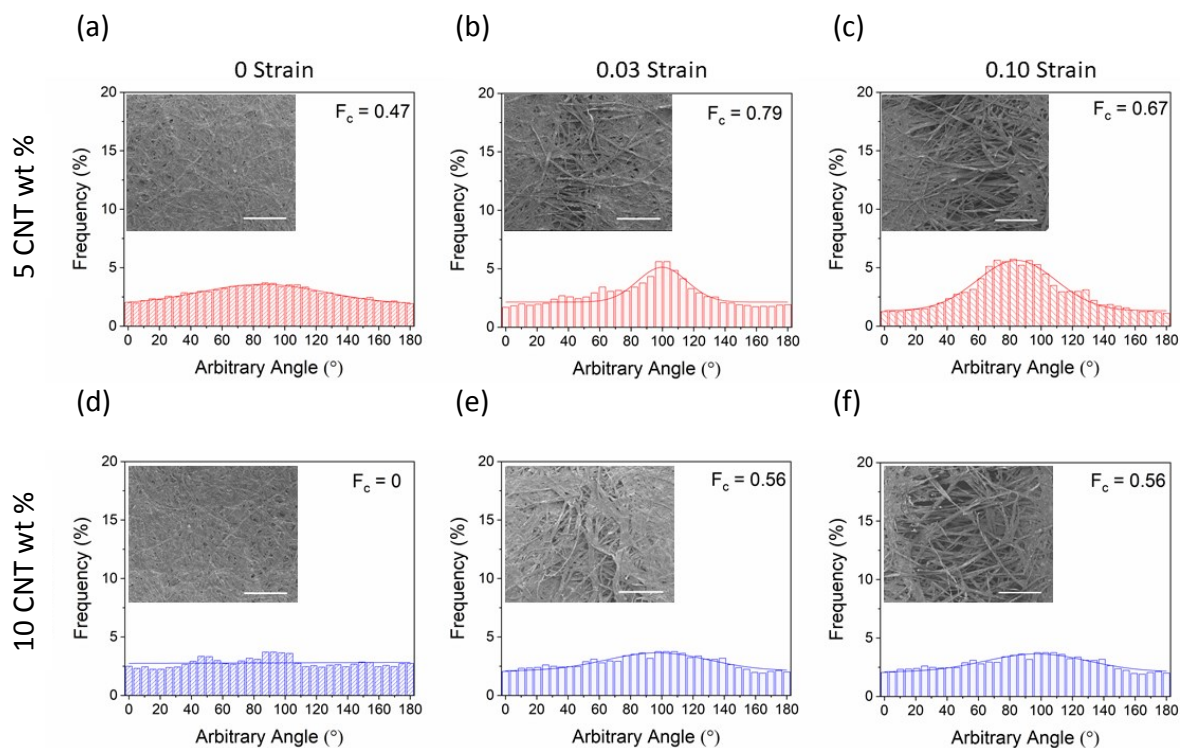

**Fig. S12** SEM images of in-plane cellulose fiber orientations and corresponding orientation factors for CPC with (a-c) 5 CNT wt % at strain of 0 (a), 0.03 (b), and 0.10 (c), and (d-f) 10 CNT wt % at strains of 0 (d), 0.03 (e), and 0.10 (f).
